# Supplementary material
Source: ML conference proceedings conference paper supplement (https://openaccess.thecvf.com/content/WACV2024/html/Cermak_WildlifeDatasets_An_Open-Source_WACV_2024_paper.html)
Supplement: Supplementary file 1 [file Cermak_WildlifeDatasets_An_Open-Source_WACV_2024_supplemental.pdf]

## A. WildlifeDatasets: Supplementary Materials

### A.1. Ablation study on model size

To showcase and quantify the performance of different MegaDescriptor flavors, we compare five variants, e.g., **Base**, **Small**, **Tiny**, and **Large-224** and **Large-384**, originating from corresponding variations of the Swin architecture. All the models were trained and evaluated using the same setting. Naturally, the model performance in terms of accuracy increased with an increasing model size, i.e., the MegaDescriptor-L-384 outperformed smaller flavors by a considerable margin in most cases. Overall, higher model complexity achieved higher performance with few exceptions, where it underperformed by a small margin, e.g., by 2.53%, 0.48%, and 0.08% on FriesianCattle2017, LeopardID2022, and MacaqueFaces respectively. This is more or less statistically insignificant, given the poor quality of the data and the data acquisition.

We visualized the accuracy of all provided MegaDescriptor flavors in Figure 9 and Table 5.

### A.2. Online Documentation – Dataset samples and tutorials

We provide extensive [documentation](#) to give users a better orientation within the WildlifeDatasets toolkit and available features. It covers a wide range of use cases of the toolkit, including a guide to installation and dataset downloading, tutorials, and how to contribute. Notably, the documentation includes a detailed description of the datasets, including image samples.

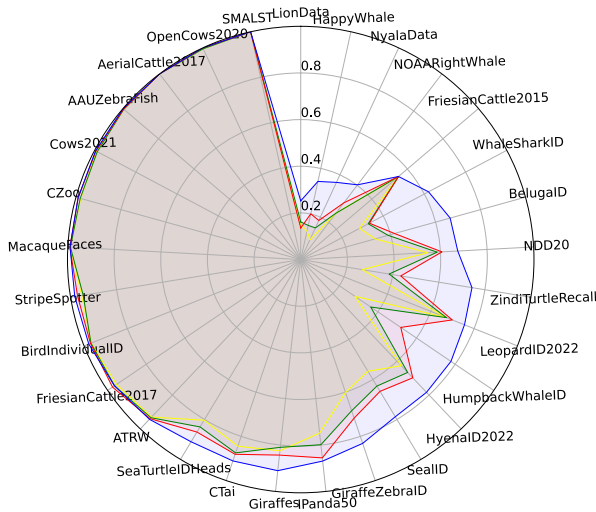

Figure 9. **Ablation study on model size/complexity.** Accuracy of different MegaDescriptor flavors MegaDescriptor-L (Swin-L/p4-w12-384), MegaDescriptor-B (Swin-B/p4-w7-224), MegaDescriptor-S (Swin-S/p4-w7-224), and MegaDescriptor-T (Swin-T/p4-w7-224) on 29 animal re-identification datasets.

|                    | MegaDescriptor-T-224 | MegaDescriptor-S-224 | MegaDescriptor-B-224 | MegaDescriptor-L-224 | MegaDescriptor-L-384 |
|--------------------|----------------------|----------------------|----------------------|----------------------|----------------------|
| AAUZebraFish       | 99.55                | 99.55                | 99.63                | 99.85                | 99.93                |
| ATRW               | 93.02                | 93.40                | 93.95                | 93.67                | 94.33                |
| AerialCattle2017   | 100.0                | 100.0                | 100.0                | 100.0                | 100.0                |
| BelugaID           | 33.12                | 38.84                | 41.74                | 47.92                | 66.48                |
| BirdIndividualID   | 96.73                | 96.81                | 97.04                | 97.21                | 97.82                |
| CTai               | 84.46                | 87.46                | 88.10                | 90.68                | 91.10                |
| CZoo               | 97.87                | 98.11                | 99.05                | 98.35                | 99.05                |
| Cows2021           | 99.13                | 98.73                | 99.37                | 99.37                | 99.54                |
| FriesianCattle2015 | 55.00                | 55.00                | 55.00                | 55.00                | 55.00                |
| FriesianCattle2017 | 95.45                | 96.46                | 97.47                | 98.99                | 96.46                |
| GiraffeZebraID     | 60.15                | 68.40                | 71.72                | 78.04                | 83.17                |
| Giraffes           | 82.46                | 80.97                | 84.33                | 87.69                | 91.04                |
| HappyWhale         | 12.58                | 14.98                | 20.07                | 25.34                | 34.30                |
| HumpbackWhaleID    | 28.12                | 36.25                | 51.83                | 63.54                | 77.81                |
| HyenalID2022       | 62.70                | 66.67                | 69.84                | 77.30                | 78.41                |
| IPanda50           | 74.84                | 79.85                | 85.53                | 85.45                | 86.91                |
| LeopardID2022      | 67.06                | 67.27                | 69.92                | 76.06                | 75.58                |
| LionData           | 14.84                | 16.13                | 13.55                | 20.65                | 25.16                |
| MacaqueFaces       | 99.04                | 98.89                | 99.12                | 98.96                | 99.04                |
| NDD20              | 54.61                | 58.57                | 60.64                | 61.58                | 67.42                |
| NOAARightWhale     | 25.16                | 24.95                | 30.51                | 34.69                | 40.26                |
| NyalaData          | 9.35                 | 14.95                | 18.46                | 21.73                | 36.45                |
| OpenCows2020       | 99.58                | 99.58                | 100.0                | 99.79                | 100.0                |
| SMALST             | 100.0                | 100.0                | 100.0                | 100.0                | 100.0                |
| SeaTurtleIDHeads   | 80.38                | 83.74                | 86.31                | 89.86                | 91.18                |
| SealID             | 55.88                | 63.31                | 65.95                | 70.02                | 78.66                |
| StripeSpotter      | 95.12                | 94.51                | 96.95                | 97.56                | 98.17                |
| WhaleSharkID       | 28.58                | 32.74                | 33.31                | 50.03                | 62.02                |
| ZindiTurtleRecall  | 26.77                | 38.38                | 43.45                | 58.14                | 74.40                |

Table 5. **Ablation study on model size/complexity.** We compare five MegaDescriptor flavors, e.g., **Large**, **Base**, **Small**, and **Tiny**, in terms of accuracy. In general, models with a bigger model size or higher input resolution outperformed their *smaller* variants by a considerable margin. The best-performing model – MegaDescriptor-L-384 – underperformed by 2.53%, 0.48%, and 0.08% on FriesianCattle2017, LeopardID2022, and MacaqueFaces, respectively.
